# Supplementary material for: The importance of topography-controlled sub-grid process heterogeneity and semi-quantitative prior constraints in distributed hydrological models
Source: Copernicus journal article supplement (doi:10.5194/hess-20-1151-2016), 2016-03-17
Supplement: Supplementary file 1 [file hess-20-1151-2016-supplement.pdf]

Supplement of Hydrol. Earth Syst. Sci., 20, 1151–1176, 2016  
<http://www.hydrol-earth-syst-sci.net/20/1151/2016/>  
doi:10.5194/hess-20-1151-2016-supplement  
© Author(s) 2016. CC Attribution 3.0 License.

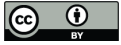

Hydrology and  
Earth System  
Sciences

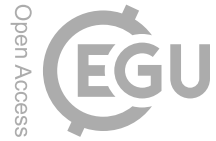

*Supplement of*

## **The importance of topography-controlled sub-grid process heterogeneity and semi-quantitative prior constraints in distributed hydrological models**

**Remko C. Nijzink et al.**

*Correspondence to:* R. C. Nijzink (r.c.nijzink@tudelft.nl)

The copyright of individual parts of the supplement might differ from the CC-BY 3.0 licence.

## 1 **Ranked Probability Score**

2 The Ranked Probability Score ( $S_{RP}$ ; Wilks, 2005) was adapted as a measure for the magnitude  
3 of the expected model improvement or deterioration. Originally,  $S_{RP}$  was designed to estimate  
4 the “distance” between an observation and an empirical cumulative distribution function,  
5 based on the area enclosed between the two (Figure 6). The Ranked Probability Score is given  
6 by:

$$7 \quad S_{RP} = \frac{1}{M-1} \sum_{m=1}^M [(\sum_{k=1}^m p_k) - (\sum_{k=1}^m o_k)]^2, \quad (8)$$

8 where  $M$  is the length of the distribution of performances of a certain signature,  $p_k$  the  
9 probability of a certain signature performance to occur and  $o_k$  the probability of the  
10 observation to occur. In our case  $o_k$  is a step function, which is either 1 or 0. For example,  $E_{NS}$   
11 has it's optimal value at 1. Thus, as there is only one time series, it has a step distribution  
12 function at 1. The model runs will have a cumulative distribution function, as multiple sets of  
13 parameters are considered as feasible. This distribution function will be close to 1 in case of  
14 model with a relatively good performance. The difference of the  $S_{RP}$  between two models was  
15 used here as a measure to identify and quantify improvement.

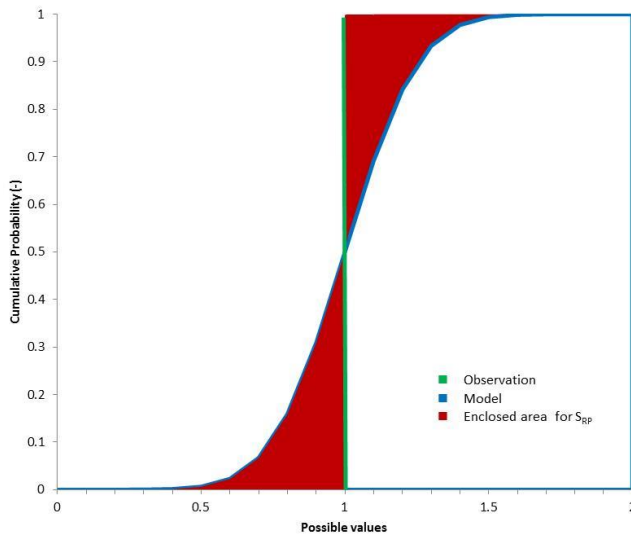

16

17 Figure S1. Graphical illustration of the ranked probability score  $S_{RP}$ . The enclosed area (red)  
18 between model (blue) and observation (green) determines the score.

19

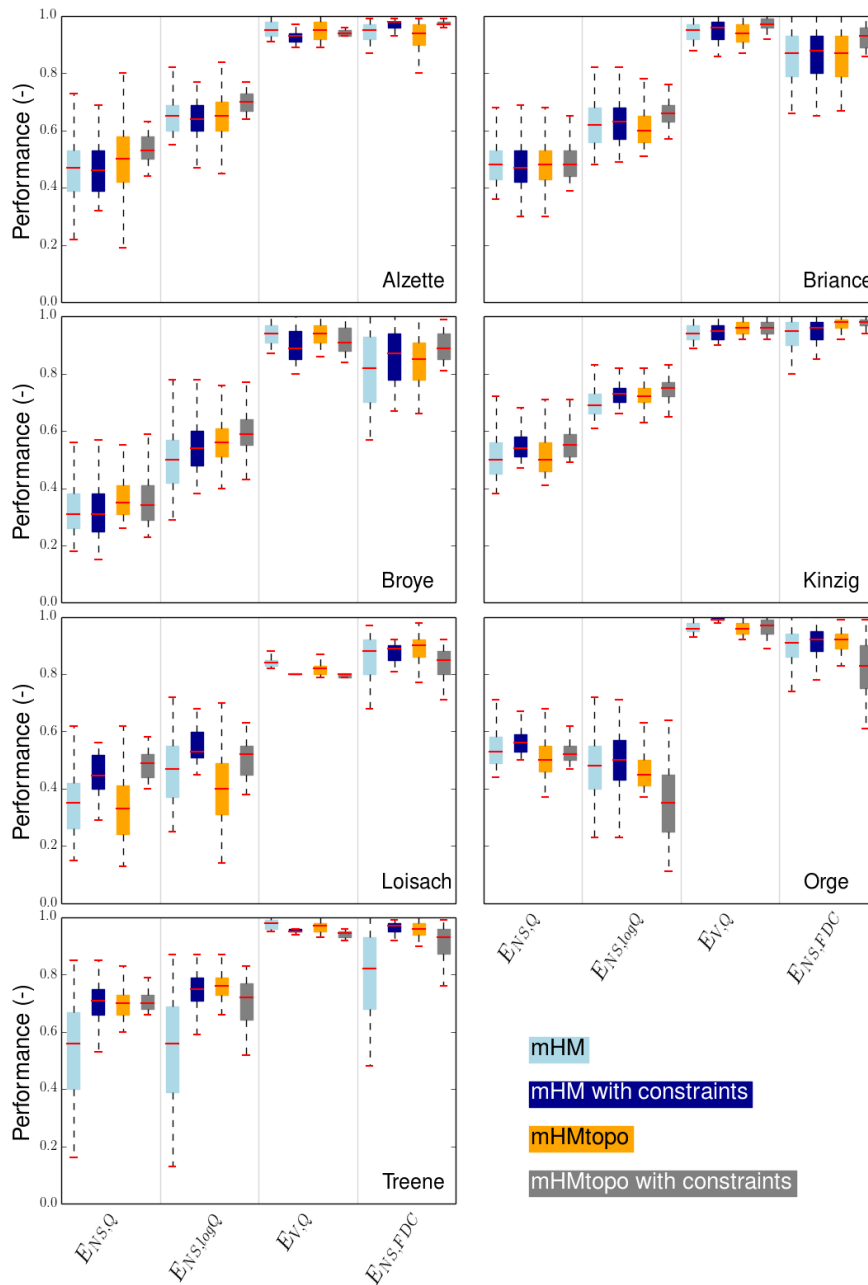

1

2 Figure S2. Nash-Sutcliffe efficiency ( $E_{NS,Q}$ ), log Nash-Sutcliffe efficiency ( $E_{NS,\log Q}$ ), volume  
 3 error ( $E_{V,Q}$ ) and log Nash-Sutcliffe efficiency of the flow duration curve ( $E_{NS,FDC}$ ) for the  
 4 seven catchments in the calibration periods. The optimal value for all four criteria is 1,  
 5 whereas 0 is regarded to have a low performance. The boxplots are formed by the Pareto  
 6 space spanned by the four objective functions.

7

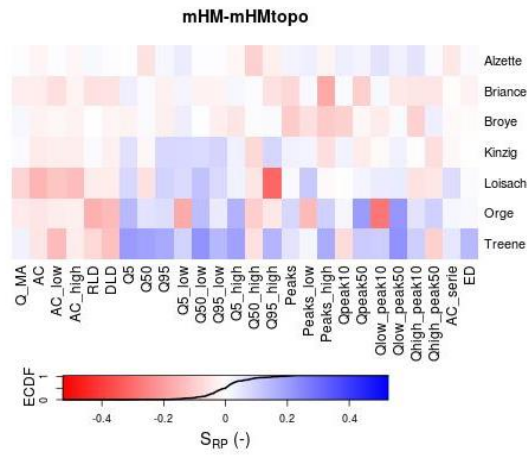

1 a)

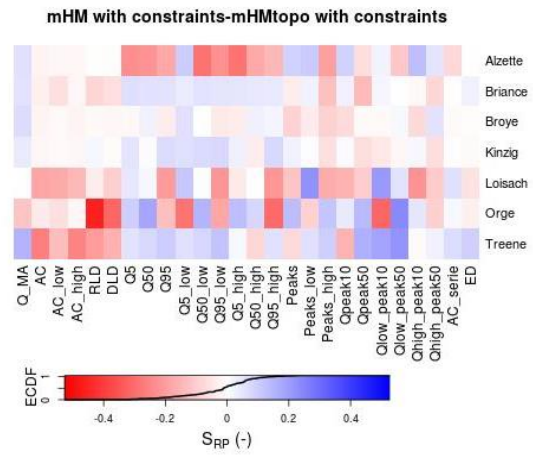

b)

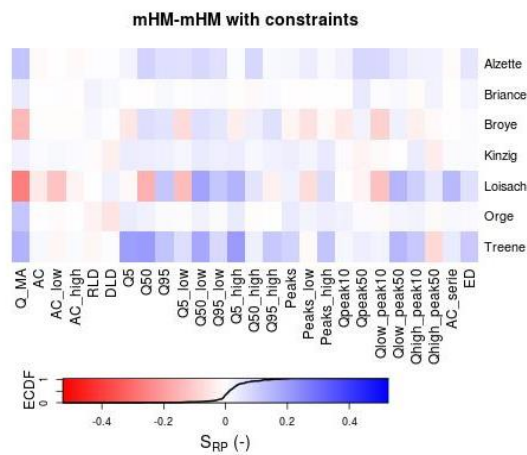

2 c)

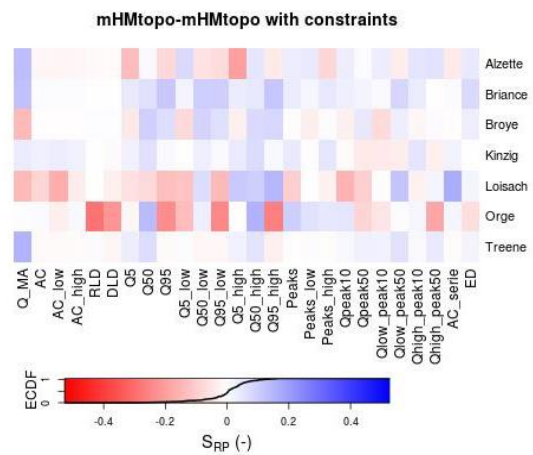

d)

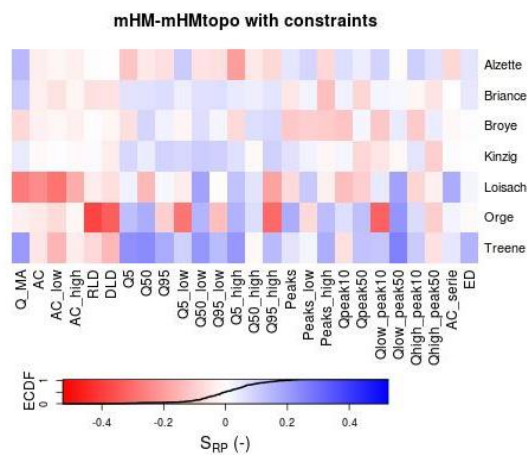

3 e)

4 Figure S3. Difference in Ranked Probability Scores between (a) mHM and mHMtopo without  
 5 constraints and (b) with constraints, (c) mHM with and without constraints, (d) mHMtopo  
 6 with and without constraints (e) the base case mHM with the constrained mHMtopo case. The  
 7 colours are linearly related to scores between the most negative values (darkred), 0 (white)  
 8 and the most positive values (darkblue), where positive values indicate an improvement. An

- 1 empirical cumulative distribution function based on all values has been added to assess the
- 2 distribution of occurring score differences.
- 3

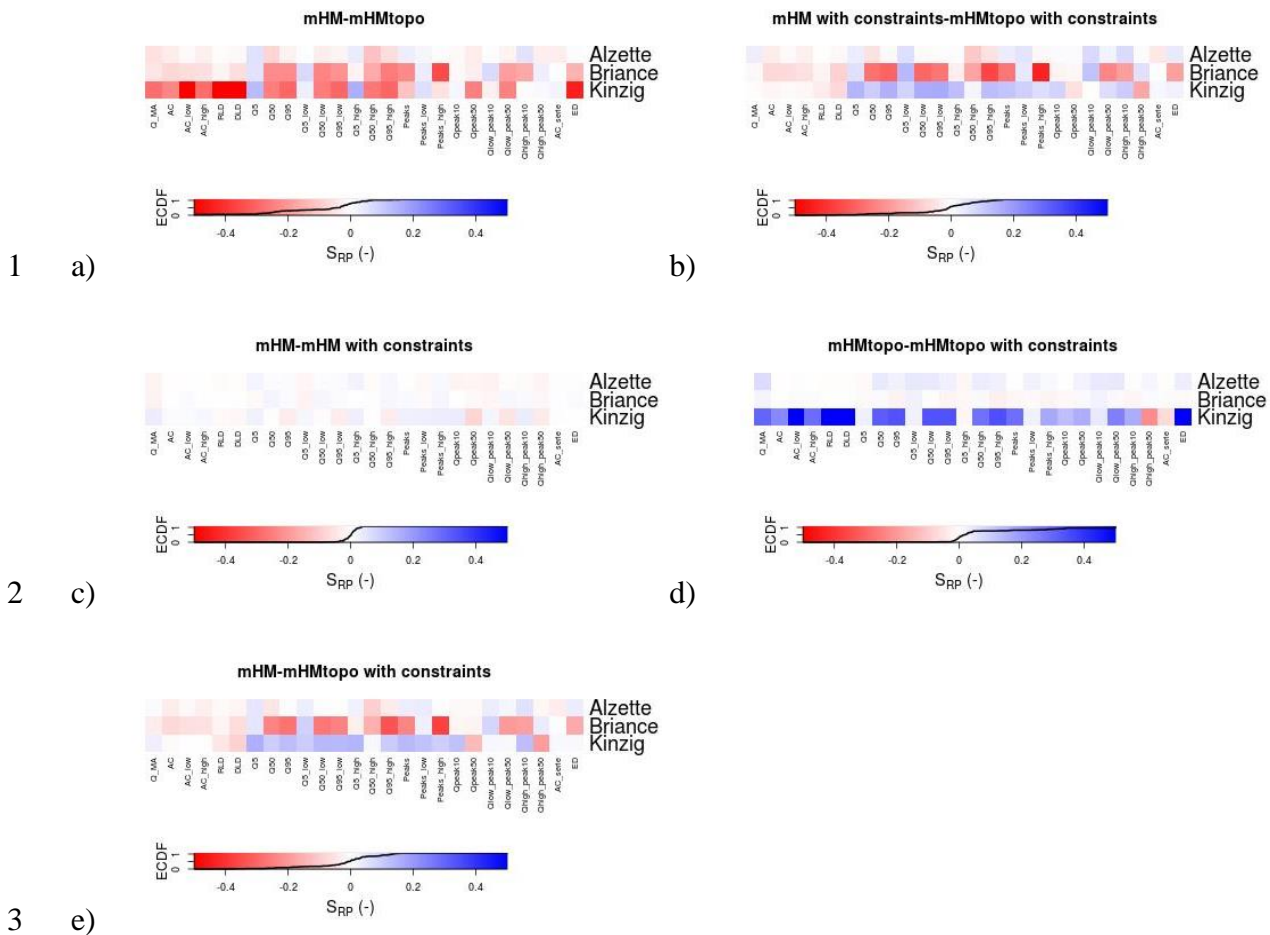

6 Figure S4. Difference in Ranked Probability Scores between (a) mHM and mHMtopo without  
7 constraints and (b) with constraints , (c) mHM with and without constraints, (d) mHMtopo  
8 with and without constraints and (e) the base case mHM with the constrained mHMtopo after  
9 the transfer of global parameters. The colours are linearly related to scores between the most  
10 negative values (darkred), 0 (white) and the most positive values (darkblue), where positive  
11 values indicate an improvement. An empirical cumulative distribution function based on all  
12 values has been added to assess the distribution of occurring score differences.
